# Supplementary material for: Effects of grazing on leaf traits and ecosystem functioning in Inner Mongolia grasslands: scaling from species to community
Source: Copernicus journal article supplement (doi:10.5194/bg-7-1117-2010), 2010-03-26
Supplement: Supplementary file 1 [file bg-7-1117-2010-supplement.zip]

Archive with 3 entries (2 files):
- Supplement/
- Supplement/Supplement_S1.xls
- Supplement/Supplement_S2.pdf
