# Supplementary material for: Effects of grazing on leaf traits and ecosystem functioning in Inner Mongolia grasslands: scaling from species to community
Source: Copernicus journal article supplement (doi:10.5194/bg-7-1117-2010), 2010-03-26
Supplement: Supplementary file 1 [file bg-7-1117-2010-supplement.zip › Supplement/Supplement_S1.xls]

## Sheet: Supplement 1
Supplement 1 Dataset for leaf-level traits of plant species across six grassland communities in the Xilin River Basin of Inner Mongolia, China.
							Ungrazed	Ungrazed	Ungrazed	Grazed	Grazed	Grazed
Community type	Species no.	Species	Family	Genus	Life form	Water ecotype	Leaf area (cm2 leaf-1)	Leaf dry mass (g leaf-1)	SLA (cm2g-1 leaf-1)	Leaf area (cm2 leaf-1)	Leaf dry mass (g leaf-1)	SLA (cm2g-1 leaf-1)
Carex appendiculata meadow	1	Heteropappus altaicus (Willd.) Novopokr.	Compositae	Heteropappus Less.	PF	MX	0.33024	0.00215228	156.797	0.113894	0.000825535	138.916
120 species belong to 84 families and 28 genera	2	Melilotus albus Desr.	Leguminosae	Melilotus Adans.	AB	M	2.71221	0.0202106	136.205
	3	Caltha natans Pall.	Ranunculaceae	Caltha L.	PF	H				18.301	0.0484906	385.017
	4	Thymus serpyllum L. var. mongolicus Roon.	Labiatae	Thymus L.	SS	MX	0.105404	0.000974459	107.819		0.000528367
	5	Melilotoides ruthenica (L.) Sojak	Leguminosae	Melilotoides Heist. Ex Fabr.	PF	MX	0.504066	0.00411293	122.556	0.507511	0.003596	141.132
	6	Mentha haplocalyx Briq.	Labiatae	Mentha L.	PF	HM	4.42894	0.01435	315.842	2.78198	0.0127302	220.487
	7	Xanthium sibiricum Patrin ex Widder	Compositae	Xanthium L.	AB	M				15.8477	0.0659638	244.989
	8	Cleistogenes squarrosa (Trin.) Keng	Gramineae	Cleistogenes Keng	PG	X	0.429886	0.003012	142.724
	9	Saussurea amara (L.) DC.	Compositae	Saussurea DC.	PF	M	19.2098	0.110324	175.964	3.81467	0.023534	159.778
	10	Melilotus suaveolens Ledeb.	Leguminosae	Melilotus Adans.	AB	XM	3.28874	0.0147832	226.511	0.573419	0.00209737	288.081
	11	Stellaria longifolia Muehl.	Caryophyllaceae	Stellaria L.	PF	HM	0.0587234	0.000309328	191.363
	12	Leontopdium longifolium Ling	Compositae	Leontopodium R. Br.	PF	XM	3.37015	0.0141176	243.418	2.14423	0.00806651	273.917
	13	Adenophora stenanthina (Ledeb.) Kitag.	Cammpanulaceae	Adenophora Fisch.	PF	XM	1.42916	0.00958919	152.073
	14	Plantago asiatica L.	Plantaginaceae	Plantago L.	PF	M	90.7379	0.385545	256.355	49.7399	0.19215	265.95
	15	Carex duriuscula C. A. Mey.	Cyperaceae	Carex L.	PF	MX	0.589447	0.00404871	145.589
	16	Artemisia sieversiana Ehrhart ex Willd.	Compositae	Artemisia L.	AB	M	17.5493	0.105636	166.13	37.7102	0.153037	246.412
	17	Sanguisorba officinalis L.	Rosaceae	Sanguisorba L.	PF	M	3.34991	0.0186483	186.883	1.5268	0.00651584	238.523
	18	Rumex thyrsiflorus Fingerh. var. mandahurica Bar. et Skv.	Polygonaceae	Rumex L.	PF	M	8.97977	0.0759587	120.798
	19	Aegopodium alpestre Ledeb.	Umbelliferae	Aegopodium L.	PF	M				2.34286	0.0113691	206.073
	20	Lepidium apetalum Willd.	Cruciferae	Lepidium L.	AB	XM	0.0929144	0.000524967	176.788	0.255547	0.00121281	214.766
	21	Achillea ptarmicoides Maxim.	Compositae	Achillea L.	PF	M	2.24208	0.0146788	157.987
	22	Hordeum brevisubulatum (Trin.) Link	Gramineae	Hordeum L.	PG	M			178.742			253.818
	23	Alopecurus brachystachyus Bieb.	Gramineae	Alopecurus L.	PG	HM	2.69998	0.0155229	173.936
	24	Potentilla multifida L.	Rosaceae	Potentilla L.	PF	M	4.695	0.0544657	86.2011	6.02675	0.0551797	109.617
	25	Potentilla anserina L.	Rosaceae	Potentilla L.	PF	M	26.3421	0.124199	213.622	15.098	0.0627917	243.208
	26	Potentilla bifurca L.	Rosaceae	Potentilla L.	PF	X	3.15544	0.0239502	132.528	3.30895	0.0226496	147.953
	27	Sibbaldia adpressa Bunge	Rosaceae	Sibbaldia L.	PF	X	1.33581	0.0143565	93.5728
	28	Calamagrostis epigejos (L.) Roth	Gramineae	Calamagrostis Adans.	PG	M	7.72682	0.0564042	136.99
	29	Trigonotis peduncularis (Trev.) Benth. ex Baker et Moore	Boraginaceae	Trigonotis Stev.	AB	XM	0.848571	0.00157253	558.053	0.95079	0.00200511	488.313
	30	Agropyron cristatum (L.) Garrtn.	Gramineae	Agropyron Gaertn.	PG	X	3.63521	0.0249624	145.627
	31	Heteropappus hispidus (Thunb.) Less.	Compositae	Heteropappus Less.	AB	M	1.65864	0.00874456	193.586	1.05463	0.0050926	209.005
	32	Vicia cracca L.	Leguminosae	Vicia L.	PF	M	0.329443	0.00114717	293.682
	33	Triglochin maritimum L.	Juncaginaceae	Triglochin L.	PF	H	1.90777	0.0193777	98.4518	4.07248	0.043994	92.5689
	34	Glaux maritima L.	Primulaceae	Glaux L.	PF	M	0.737257	0.00271129	273.942	0.344971	0.00164076	210.993
	35	Silene jenisseensis Willd.	Caryophyllaceae	Silene L.	PF	X	0.813654	0.00777542	104.958
	36	Lappula myosotis V. Wolf.	Boraginaceae	Lappula V. Wolf.	AB	XM	0.167801	0.00103936	161.33	0.38212	0.00235441	164.684
	37	Artemisia palustris L.	Compositae	Artemisia L.	AB	M				0.429686	0.00288259	151.719
	38	Artemisia rubripes Nakai	Compositae	Artemisia L.	PF	M	8.66938	0.0416665	210.612	3.74954	0.0143058	266.674
	39	Polygonum alopecuroides Tuecz. ex Besser	Polygonaceae	Polygonum L.	PF	M	18.7009	0.101762	181.744	14.9898	0.0767589	197.723
	40	Taraxacum sinicum Kitag.	Compositae	Taraxacum Weber	PF	M				3.13944	0.0156898	206.945
	41	Halerpestes ruthenica (Jacq.) Ovcz.	Ranunculaceae	Halerpestes Greene	PF	M				3.51729	0.0179813	199.311
	42	Medicago falcata L.	Leguminosae	Medicago L.	PF	XM	0.872087	0.00434423	204.604	0.883427	0.00440962	197.629
	43	Geranium wlassowianum Fisch. ex Link	Geraniaceae	Geranium L.	PF	HM	11.8728	0.049069	247.87	5.78392	0.0226325	258.985
	44	Chenopodium glaucum L.	Chenopodiaceae	Chenopodium L.	AB	M	0.733762	0.00543859	135.915	1.79163	0.00907433	201.61
	45	Carex appendiculata (Trautv.) Kükenth.	Cyperaceae	Carex L.	PF	H	2.58715	0.014667	176.392			155.567
	46	Carex rostrata Stokes ex With.	Cyperaceae	Carex L.	PF	H			112.207	8.6783	0.044351	195.673
	47	Chenopodium acuminatum Willd.	Chenopodiaceae	Chenopodium L.	AB	M	1.33239	0.0109997	123.42	2.76925	0.0133794	209.993
	48	Kochia scopari (L.) Schrad. var. sieversiana (Pall.) Ulbr. ex Aschers. et Graebn.	Chenopodiaceae	Kochia Roth	AB	XM				0.551666	0.0029324	189.951
	49	Artemisia anethifolia Web. ex Stechm.	Compositae	Artemisia L.	AB	M	1.1304	0.007889	143.288
	50	Thalictrum simplex L.	Ranunculaceae	Thalictrum L.	PF	M	8.83976	0.0434879	207.441
	51	Ligularia sagitta (Maxim.) Mattf.	Compositae	Ligularia Cass.	PF	HM	119.748	0.71013	188.732
	52	Polygonum sieboldii Meisn.	Polygonaceae	Polygonum L.	AB	M	2.24868	0.00637947	358.546
	53	Potentilla tanacetifolia Willd. ex Schlecht.	Rosaceae	Potentilla L.	PF	MX	4.84826	0.0457067	106.866
	54	Agrostis gigantea	Gramineae	Agrostis L.	PG	M	2.44796	0.0124437	196.723			195.62
	55	Sonchus arvensis L.	Compositae	Sonchus L.	PF	M	37.1121	0.135659	274.885
	56	Bidens tripartita L.	Compositae	Bidens L.	AB	M				3.43753	0.0156627	227.215
	57	Artemisia frigida Willd.	Compositae	Artemisia L.	SS	X	0.705761	0.0041699	169.251	0.515758	0.0027462	187.808
	58	Cirsium esculentum (Sievers) C. A. Mey.	Compositae	Cirsium Mill emend. Scop.	PF	M	45.9092	0.265479	177.625	60.3211	0.461791	137.617
	59	Polygonum amphibium L.	Polygonaceae	Polygonum L.	PF	HM				5.68889	0.0257485	248.749
	60	Odontites serotina (Lam.) Dum.	Scrophulariaceae	Odontites Ludwig	AB	M	0.420308	0.00304382	142.02	0.387795	0.00281736	139.083
	61	Artemisia tanacetigolia L.	Compositae	Artemisia L.	PF	M	19.5518	0.127956	152.801	6.13369	0.036589	168.24
	62	Phragmites australis (Cav.) Trin. ex Steudel	Gramineae	Phragmites Adans.	PG	H	14.9009	0.115389	129.136
	63	Caltha palustris L.	Ranunculaceae	Caltha L.	PF	HM	31.2615	0.139274	230.506
	64	Iris lactea Pall. var. chinensis (Fisch.) Koidz.	Iridaceae	Iris L.	PF	M	19.2154	0.359307	53.4791	3.79987	0.0393443	96.5797
	65	Silene repens Patr.	Caryophyllaceae	Silene L.	PF	M	0.770924	0.0044372	175.108
	66	Ranunculus japonicus Thunb.	Ranunculaceae	Ranunculus L.	PF	HM	8.14879	0.0356401	224.589	6.06396	0.0275926	223.95
	67	Rumex gmelinii Turcz.	Polygonaceae	Rumex L.	PF	M	111.974	0.495014	229.025	77.7703	0.372012	218.393
	68	stachys riederi Cham. ex Bench.	Labiatae	Stachys L.	PF	HM	7.38021	0.0239129	311.828	2.16441	0.0101454	215.217
	69	Parnassia palustris L.	Saxifragaceae	Parnassia L.	PF	HM	3.52029	0.0165324	213.828	4.22913	0.0200818	216.438
	70	Blysmus rufus (Huds.) Link	Cyperaceae	Blysmus Panz.	PF	H			161.56	2.38207	0.014509	164.179
	71	Elymus dahuricus Turcz.	Gramineae	Elymus L.	PG	M	13.0732	0.108249	120.769			162.989
	72	Thermopsis lanceolata R. Br.	Leguminosae	Thermopsis R. Br.	PF	MX	9.09739	0.0735799	125.527
	73	Taraxacum mongolicum Hand.	Compositae	Taraxacum Weber	PF	M	8.83872	0.0430471	217.735	5.19132	0.0206539	254.144
	74	Pycreus globosus (All.) Reichb.	Cyperaceae	Pycreus Beauv.	PF	H				1.26438	0.00525071	242.806
	75	Lysimachia thyrsiflora L.	Primulaceae	Lysimachia L.	PF	H	6.17877	0.0214527	292.026
	76	Galium trifidum L.	Rubiaceae	Galium L.	PF	M	0.0906159	0.000734123	124.844
	77	Allium senescens L.	Liliaceae	Allium L.	PF	MX			117.026
	78	Lathyrus quinquenervius (Miq.) Litv. ex Kom. et Alis.	Leguminosae	Lathyrus L.	PF	M	6.79776	0.028059	258.43
	79	Hippuris vulgaris L.	Hippuridaceae	Hippuris L.	PF	H				0.794638	0.00401567	197.884
	80	Carex humida Y. L. Chang et Y. L. Yang	Cyperaceae	Carex L.	PF	H						157.329
	81	Spiranthes sinensis (Pers.)	Orchidaceae	Spiranthes Rich	PF	HM				2.41123	0.0114647	226.009
	82	Polygonum hydropiper L.	Polygonaceae	Polygonum L.	AB	HM	3.42252	0.013549	257.086	1.33524	0.00596136	224.663
	83	Triglochin palustre L.	Juncaginaceae	Triglochin L.	PF	H				1.19101	0.0111839	106.493
	84	Equisetum fluviatile L.	Equisetacae	Equisetum L.	PF	H	18.3802	0.0954894	192.485
	85	Cardamine lyrata Bunge	Cruciferae	Cardamine L.	PF	HM	2.04546	0.00307904	679.195
	86	Polygonum lapathifolium L.	Polygonaceae	Polygonum L.	AB	M	6.05427	0.0255501	236.645
	87	Pedicularis spicata Pall.	Scrophulariaceae	Pedicularis L.	AB	M				0.412662	0.00296315	141.806
	88	Scutellaria regeliana Nakai var. ikonnikovii (Juz.) C. Y. Wu et H. W. Li	Labiatae	Scutellaria L.	PF	M	1.35603	0.00434076	319.9
	89	Medicago lupulina L.	Leguminosae	Medicago L.	AB	M				1.8766	0.00599165	314.706
	90	Carum buriaticum Turcz.	Umbelliferae	Carum L.	AB	XM	12.7965	0.044766	285.853	1.74322	0.00495622	351.723
	91	Equisetum arvense L.	Equisetacae	Equisetum L.	PF	M	6.55361	0.041252	158.868			308.294
	92	Carex enervis C. A. Mey.	Cyperaceae	Carex L.	PF	M			207.491
	93	Bromus inermis Leyss.	Gramineae	Bromus L.	PG	M	3.78391	0.0233897	161.777
	94	Dontostemon eglandulosus (DC.) Ledeb.	Cruciferae	Dontostemon Andrz.	AB	X	0.0835972	0.000695872	119.974
	95	Bassia dasyphylla (Fisch. et Mey.) O	Chenopodiaceae	Bassia All	AB	X				0.181461	0.0011185	163.95
	96	Polygonum sibiricum Laxm.	Polygonaceae	Polygonum L.	PF	M	7.70799	0.0537696	143.507	1.30722	0.00999455	132.473
	97	Dontostemon eglandulosus (DC.) Ledeb.	Cruciferae	Dontostemon Andrz.	PF	XM	1.17837	0.00804367	147.921
	98	Hordeum roshevitzii Bowd.	Gramineae	Hordeum L.	PG	M		0.0176047		1.21511	0.00693833	175.13
	99	Oxytropis glabra (Lam.) DC. var.tannis Palib.	Leguminosae	Oxytropis DC.	PF	M	0.373749	0.00156972	242.081	0.17599	0.000708612	253.74
	100	Astragalus adsurgens Pall.	Leguminosae	Astragalus L.	PF	MX	0.225895	0.00187754	120.363
	101	Cnidium dahuricum (Jacq.) Turcz. ex Mey.	Umbelliferae	Cnidium Cuss.	AB	M				4.12316	0.0188389	220.055
	102	Potentilla acaulis L.	Rosaceae	Potentilla L.	PF	X	2.19268	0.0184841	118.677
	103	Puccinellia tenuiflora (Griseb.) Scribn. et Merr.	Gramineae	Puccinellia Parl.	PG	M	0.364398	0.00308147	118.255	0.511792	0.002682	190.825
	104	Polygonum aviculare L.	Polygonaceae	Polygonum L.	AB	M	0.463778	0.0023946	193.264	0.658657	0.00244855	256.208
	105	Inula britanica L. var. japonica (Thunb.) Franch. et Sav.	Compositae	Inula L.	PF	M	5.51673	0.0215625	266.572	7.79066	0.0356728	224.405
	106	Plantago maritima L. var. salsa (Pall.) Pilger	Plantaginaceae	Plantago L.	PF	M	5.17036	0.0613687	84.2508	0.693386	0.00714367	102.17
	107	Leymus chinensis (Trin.) Tzvel.	Gramineae	Leymus Hochst.	PG	X	6.89811	0.0451615	152.743
	108	Trifolium lupinaster L.	Leguminosae	Trifolium L.	PF	M	4.13058	0.0180403	230.596	3.82011	0.0140848	272.555
	109	Allium ramosum L.	Liliaceae	Allium L.	PF	MX	2.81951	0.0221516	127.283
	110	Malva verticillata L.	Malvaceae	Malva L.	AB	M				9.75251	0.0430342	239.468
	111	Deyeuxia arundinacea (L.)	Gramineae	Deyeuxia Clarion	PG	M	5.74933	0.0279973	205.353
	112	Sium suave Walt.	Umbelliferae	Sium L.	PF	H	2.81952	0.0132905	214.98	0.955452	0.00450449	213.372
	113	Epilobium palustre L.	Onagraceae	Epilobium L.	PF	H				1.14691	0.00368223	315.702
	114	Eleocharis intersita Zinserl.	Cyperaceae	Eleocharis R. Br.	PF	H				15.084	0.0305553	493.661
	115	Axyris amaranthoides L.	Chenopodiaceae	Axyris L.	AB	M	0.673391	0.00454661	149.326	1.14633	0.00548831	219.13
	116	Astragalus tataricus Franch.	Leguminosae	Astragalus L.	PF	MX	0.219418	0.0010786	201.877	1.62335	0.0099022	178.844
	117	Adenophora stenanthina (Ledeb.) Kitag. var. erispata (Korsh.) Y. Z. Zhao	Cammpanulaceae	Adenophora Fisch.	PF	XM	1.37572	0.0105918	129.817
	118	Salsola collina Pall.	Chenopodiaceae	Salsola L.	AB	XM				0.140588	0.00117645	120.256
	119	Artemisia scoparia Waldst. et Kit. Pl. var. Hung.	Compositae	Artemisia L.	AB	X	0.621595	0.00544269	114.207			146.597
	120	Medicago sativa L.	Leguminosae	Medicago L.	PF	M	1.13255	0.00769686	148.099
Stipa baicalensis meadow steppe	1	Heteropappus altaicus (Willd.) Novopokr.	Compositae	Heteropappus Less.	PF	MX	0.501431	0.00479357	103.905	0.847957	0.00772399	111.222
89 species belong to 26 families and 66 genera	2	Allium anisopodium Ledeb.	Liliaceae	Allium L.	PF	M	0.271453	0.00317987	85.3661	3.07895	0.0383309	80.3255
	3	Artemisia argyi Lévl. et Van.	Compositae	Artemisia L.	PF	M	8.28535	0.0625617	132.435
	4	Artemisia sacrorum Ledeb.	Compositae	Artemisia L.	PF	MX	5.76981	0.0486346	123.408
	5	Thalictrum petaloideum L.	Ranunculaceae	Thalictrum L.	PF	XM	6.59787	0.0439763	150.032			121.661
	6	Haplophyllum dauricum (L.) Juss.	Rutaceae	Haplophyllum Juss.	PF	X	0.20216	0.00217256	93.2128	0.245426	0.00231406	106.865
	7	Stipa baicalensis Roshev.	Gramineae	Stipa L.	PG	MX	2.73606	0.0287027	95.3242	3.51056	0.0319193	109.982
	8	Melilotoides ruthenica (L.) Sojak	Leguminosae	Melilotoides Heist. Ex Fabr.	PF	MX	0.72519	0.0057934	125.175	0.666708	0.0053252	125.199
	9	Cleistogenes squarrosa (Trin.) Keng	Gramineae	Cleistogenes Keng	PG	X	0.471615	0.0038304	123.124	0.910794	0.00426327	213.638
	10	Astragalus melilotoides Pall.	Leguminosae	Astragalus L.	PF	MX	0.913889	0.0108934	85.2134
	11	Polygonum divaricatum L.	Polygonaceae	Polygonum L.	PF	XM	6.20873	0.0327494	191.004	3.86483	0.0266773	147.014
	12	Androsace longifolia Turcz.	Primulaceae	Androsace L.	PF	X	0.623225	0.00731759	85.0478	0.877007	0.00832462	105.396
	13	Adenophora stenanthina (Ledeb.) Kitag.	Cammpanulaceae	Adenophora Fisch.	PF	XM	0.74423	0.00553301	134.824	1.1452	0.00824824	140.375
	14	Chenopodium aristatum L.	Chenopodiaceae	Chenopodium L.	AB	M				1.37374	0.00768134	179.946
	15	Delphinium grandiflorum L.	Ranunculaceae	Delphinium L.	PF	XM	5.13983	0.0382922	134.227	5.47652	0.0369782	148.101
	16	Gentiana dahurica Fisch.	Gentianaceae	Gentiana L.	PF	MX	8.11167	0.082773	98.9775	8.52994	0.089818	96.5167
	17	Cymbaria dahurica L.	Scrophulariaceae	Pedicularis L.	PF	X	0.253928	0.00292509	86.7592	0.198702	0.00245743	80.6541
	18	Leibnitzia anandria (L.) Turcz.	Compositae	Leibnitzia Cass.	PF	M	9.48861	0.0827521	115.167
	19	Potentilla conferta Bunge	Rosaceae	Potentilla L.	PF	X	19.9329	0.15954	126.185
	20	Artemisia sieversiana Ehrhart ex Willd.	Compositae	Artemisia L.	AB	M	15.9791	0.109355	146.122	7.1292	0.0399987	178.236
	21	Sanguisorba officinalis L.	Rosaceae	Sanguisorba L.	PF	M	4.14852	0.0319351	130.752	4.91404	0.0397389	124.553
	22	Schizonepeta multifida (L.) Briq.	Labiatae	Schizonepeta Briq.	PF	MX	2.20644	0.0198817	111.199	2.4695	0.0205828	135.447
	23	Oxytropis myriophylla (Pall.) DC	Leguminosae	Oxytropis DC.	PF	MX	0.0570588	0.000546444	104.418	0.0541521	0.000650313	82.7255
	24	Potentilla bifurca L.	Rosaceae	Potentilla L.	PF	X	6.34636	0.067999	93.5379	5.73054	0.0527924	108.529
	25	Saposhnikovia divaricata (Turcz.) Schischk.	Umbelliferae	Saposhnikovia Schischk.	PF	X	8.90703	0.0833883	106.814	8.35092	0.07424	112.485
	26	Sedum aizoon L.	Crassulaceae	Sedum L.	PF	XM	2.33971	0.0113428	207.736	1.80839	0.0104413	175.845
	27	Saussurea japonica (Thunb.) DC.	Compositae	Saussurea DC.	AB	M	12.5915	0.110036	120.125	6.61491	0.0559191	119.964
	28	Aster alpinus L.	Compositae	Aster L.	PF	M	6.058	0.0424503	143.471
	29	Agropyron cristatum (L.) Garrtn.	Gramineae	Agropyron Gaertn.	PG	X	2.37598	0.0213818	111.122	2.979	0.024583	121.181
	30	Tephroseris kirilowii (Turcz. ex DC.) Holub	Compositae	Tephroseris (Reichb.) Reichb.	PF	MX	12.9022	0.142566	91.8512	11.4045	0.146814	78.9948
	31	Setaria viridis (L.)	Gramineae	Setaria Beauv.	AB	M				9.68349	0.0358573	270.056
	32	Bupleurum scorzonerifolium Willd.	Umbelliferae	Bupleurum L.	PF	X	2.31552	0.0256639	93.5366	2.9211	0.030836	96.0592
	33	Pedicularis striata Pall.	Scrophulariaceae	Pedicularis L.	PF	M	5.22716	0.0621538	85.2691
	34	Scabiosa tschiliensis Grunning	Dipsacaceae	Scabiosa L.	PF	MX	3.25204	0.0310534	107.02	5.39638	0.0495545	120.717
	35	Hedysarum gmelinii Ledeb.	Leguminosae	Hedysarum L.	PF	X	1.32719	0.0114069	116.727
	36	Hemerocallis citrina Baroni	Liliaceae	Hemerocallis L.	PF	M	17.0873	0.145102	117.761	13.7316	0.0974637	140.889
	37	Allium condensatum Turcz.	Liliaceae	Allium L.	PF	MX	11.3823	0.07914	143.825	14.7411	0.100361	146.88
	38	Medicago falcata L.	Leguminosae	Medicago L.	PF	XM	0.713583	0.00340863	209.682
	39	Astragalus membranaceus Bunge	Leguminosae	Astragalus L.	PF	M	0.31721	0.0022456	143.996
	40	Scutellaria baicalensis Georgi	Labiatae	Scutellaria L.	PF	MX	1.24774	0.00957657	131.577	0.857543	0.00780588	110.26
	41	Chenopodium glaucum L.	Chenopodiaceae	Chenopodium L.	AB	M	1.86872	0.0101997	187.654	2.91183	0.0182795	166.583
	42	Leontopdium leontopodioides (Willd.) Beauv.	Compositae	Leontopodium R. Br.	PF	X	0.966391	0.00671764	144.378	0.496734	0.00488655	104.897
	43	Achnatherum splendens (Trin.) Nevski	Gramineae	Achnatherum Beauv.	PG	XM			53.5202
	44	Carex pediformis C. A. Mey.	Cyperaceae	Carex L.	PF	MX	23.8071	0.196498	121.157
	45	Potentilla tanacetifolia Willd. Ex Schlecht.	Rosaceae	Potentilla L.	PF	MX	9.87309	0.103378	96.4292	10.1005	0.0987605	102.866
	46	Stellera chamaejasme L.	Thymelaeaceae	Stellera L.	PF	X	0.376359	0.00262702	143.158	0.630629	0.0041994	150.537
	47	Artemisia frigida Willd.	Compositae	Artemisia L.	SS	X	0.503054	0.00409073	122.974	0.433466	0.00318823	135.958
	48	Artemisia tanacetigolia L.	Compositae	Artemisia L.	PF	M	4.00448	0.0297869	134.903	6.70717	0.0515714	133.232
	49	Artemisia dracunculus L.	Compositae	Artemisia L.	PF	M	0.425583	0.00365736	117.453
	50	Spiraea aquilegifolia Pall.	Rosaceae	Spiraea L.	SS	XM				0.387347	0.00313797	125.374
	51	Potentilla verticillaris Steph. ex Willd.	Rosaceae	Potentilla L.	PF	X	4.71403	0.0648197	72.7254
	52	Serratula centauroides L.	Compositae	Serratula L.	PF	MX	17.0921	0.198931	87.7978	13.3568	0.152437	88.2337
	53	Urtica cannabina L.	Urticaceae	Urtica L.	PF	M	4.85589	0.0380814	127.761
	54	Erodium stephanianum Willd.	Geraniaceae	Erodium L. Herit	AB	XM	5.11197	0.0270683	188.854
	55	Clematis hexapetala Pall.	Ranunculaceae	Clematis L.	PF	MX	5.28703	0.0541473	97.6416	7.11474	0.0779618	92.8231
	56	Artemisia desertorum Spreng.	Compositae	Artemisia L.	PF	X	8.54762	0.0650503	131.4	14.6506	0.102283	143.236
	57	Kochia prostrata (L.) Schrad.	Chenopodiaceae	Kochia Roth	SS	X	0.561183	0.00539543	104.011
	58	Iris ventricosa Pall.	Iridaceae	Iris L.	PF	MX	8.35144	0.17928	46.5832			45.5792
	59	Thalictrum minus L.	Ranunculaceae	Thalictrum L.	PF	M	26.5329	0.211681	125.344	20.8144	0.183586	113.377
	60	Galium verum L.	Rubiaceae	Galium L.	PF	M	0.0882097	0.00102606	87.533	0.0869856	0.00104159	83.7669
	61	Thermopsis lanceolata R. Br.	Leguminosae	Thermopsis R. Br.	PF	MX	4.85132	0.0366876	132.53	1.90906	0.0125433	153.485
	62	Koeleria cristata (L.) Pers.	Gramineae	Koeleria Pers.	PG	X	1.71237	0.015383	111.316
	63	Ligularia mongolica (Turcz.) DC.	Compositae	Ligularia Cass.	PF	XM	65.549	0.770915	85.7418	30.4717	0.335327	91.9261
	64	Allium bidentatum Fisch. ex Prokh.	Liliaceae	Allium L.	PF	X	1.10473	0.00842833	131.073	1.33662	0.0105083	127.196
	65	Allium senescens L.	Liliaceae	Allium L.	PF	MX	3.70277	0.0283242	130.728	4.16075	0.0500085	83.2009
	66	Hieracium umbellatum L.	Compositae	Hieracium L.	PF	M	2.00468	0.0174093	116.929
	67	Vicia amoena Fisch.	Leguminosae	Vicia L.	PF	XM	0.889354	0.00754623	116.96	8.1274	0.0686083	118.628
	68	Iris dichotoma Pall.	Iridaceae	Iris L.	PF	MX	17.517	0.119817	148.348	15.9605	0.100991	159.853
	69	Dianthus chinensis L.	Caryophyllaceae	Dianthus L.	PF	XM	0.673292	0.00593065	113.852	0.693358	0.00624215	112.114
	70	Linum perenne L.	Linaceae	Linum L.	PF	X	0.164893	0.00120589	137.743
	71	Vicia unijuga R. Br.	Leguminosae	Vicia L.	PF	M	3.49018	0.0242813	144.111
	72	Olgaea lomonosowii (Trautv.) I1jin	Compositae	Olgaea Iljin	PF	MX	13.755	0.209107	65.8376	18.9007	0.256371	75.2684
	73	Bromus inermis Leyss.	Gramineae	Bromus L.	PG	M	7.93571	0.0518807	152.961
	74	Pulsatilla turczaninovii Kryl. et Serg.	Ranunculaceae	Pulsatilla Adans.	PF	MX	8.15142	0.10231	79.6742	15.1857	0.176586	85.9964
	75	Allium tenuissimum L.	Liliaceae	Allium L.	PF	X				1.85032	0.0206717	89.51
	76	Veronica linariifolia Pall. ex Link	Scrophulariaceae	Veronica L.	PF	XM	0.755192	0.00731156	104.482	0.711326	0.00675387	106.383
	77	Filifolium sibiricum (L.) Kitam.	Compositae	Filifolium Kitam.	PF	MX	0.93171	0.0118925	78.3441	1.01427	0.0128833	78.7274
	78	Astragalus adsurgens Pall.	Leguminosae	Astragalus L.	PF	MX				0.439038	0.00349077	126.463
	79	Asparagus dauricus Fisch. ex Link	Liliaceae	Asparagus L.	PF	MX	0.0961761	0.000899085	104.97
	80	Potentilla acaulis L.	Rosaceae	Potentilla L.	PF	X	3.34854	0.0329601	101.692	2.74099	0.023667	117.667
	81	Leymus chinensis (Trin.) Tzvel.	Gramineae	Leymus Hochst.	PG	X	7.93512	0.0656637	120.845	5.60594	0.0522607	107.269
	82	Allium ramosum L.	Liliaceae	Allium L.	PF	MX	4.55129	0.0303877	149.774	3.91531	0.029272	133.756
	83	Papaver nudicaule L.	Papaveraceae	Papaver L.	PF	XM	5.95309	0.0441264	136.504
	84	Leonurus japonicus Houtt.	Labiatae	Leonurus L.	AB	M				4.47314	0.0266769	167.578
	85	Achnatherum sibiricum (L.) Keng	Gramineae	Achnatherum Beauv.	PG	MX		0.0399713
	86	Anemarrhena asphodeloides Bunge	Liliaceae	Anemarrhena Bunge	PF	MX	8.48054	0.0624897	135.711
	87	Adenophora stenanthina (Ledeb.) Kitag. Var. erispata (Korsh.) Y. Z. Zhao	Cammpanulaceae	Adenophora Fisch.	PF	XM	0.952377	0.00653986	146.974	0.97265	0.00676172	146.147
	88	Salsola collina Pall.	Chenopodiaceae	Salsola L.	AB	XM	0.181028	0.00226803	84.428	0.130457	0.00206374	64.877
	89	Festuca rubra L.	Gramineae	Festuca L.	PG	M	1.2744	0.0088892	143.365	1.03732	0.010695	96.9909
Leymus chinensis typical steppe	1	Heteropappus altaicus (Willd.) Novopokr.	Compositae	Heteropappus Less.	PF	MX	0.703114	0.00528991	134.946
67 species belong to 24 families and 50 genera	2	Allium anisopodium Ledeb.	Liliaceae	Allium L.	PF	M	2.55114	0.0402693	63.3518
	3	Artemisia argyi Lévl. et Van.	Compositae	Artemisia L.	PF	M	7.59598	0.041034	185.114
	4	Thalictrum petaloideum L.	Ranunculaceae	Thalictrum L.	PF	XM	0.830456	0.00850145	99.8848	1.13579	0.00731926	168.239
	5	Alyssum lenense Adams	Cruciferae	Alyssum L.	PF	X	7.80974	0.0239649	316.735
	6	Haplophyllum dauricum (L.) Juss.	Rutaceae	Haplophyllum Juss.	PF	X	0.21641	0.0018513	118.36
	7	Melilotoides ruthenica (L.) Sojak	Leguminosae	Melilotoides Heist. Ex Fabr.	PF	MX				0.403234	0.00318493	126.607
	8	Phlomis umbrosa Turcz.	Labiatae	Phlomis L.	PF	M	18.1788	0.147267	123.534	11.7226	0.103312	117.851
	9	Cleistogenes squarrosa (Trin.) Keng	Gramineae	Cleistogenes Keng	PG	X	0.427307	0.00246922	173.053	0.201483	0.0012892	156.285
	10	Saussurea amara (L.) DC.	Compositae	Saussurea DC.	PF	M	8.19452	0.0726976	110.031
	11	Polygonum divaricatum L.	Polygonaceae	Polygonum L.	PF	XM	5.99021	0.0400777	149.497
	12	Adenophora stenanthina (Ledeb.) Kitag.	Cammpanulaceae	Adenophora Fisch.	PF	XM	1.54523	0.012941	121.135
	13	Chenopodium aristatum L.	Chenopodiaceae	Chenopodium L.	AB	M				0.704068	0.00422625	166.613
	14	Cymbaria dahurica L.	Scrophulariaceae	Pedicularis L.	PF	X	0.183194	0.00193621	94.4418
	15	Stipa grandis P. Smirn.	Gramineae	Stipa L.	PG	X	3.60321	0.0348957	103.257	1.59932	0.0169875	94.1466
	16	Artemisia sieversiana Ehrhart ex Willd.	Compositae	Artemisia L.	AB	M	18.0221	0.116476	154.728
	17	Cynanchum thesioides (Freyn) K. Schum.	Asclepiadaceae	Cynanchum L.	PF	X	1.14857	0.00944379	119.6
	18	Orosiachys malacephyllus (Pall.) Fisch.	Crassulaceae	Orosiachys (DC.) Fisch.	AB	X	5.15219	0.0256377	205.507
	19	Potentilla bifurca L.	Rosaceae	Potentilla L.	PF	X	7.17222	0.0650923	110.229
	20	Limonium bicolor (Bunge) O.Kuntze	Plumbaginaceae	Limonium Mill.	PF	X	13.0021	0.119107	111.02
	21	Saposhnikovia divaricata (Turcz.) Schischk.	Umbelliferae	Saposhnikovia Schischk.	PF	X	6.84701	0.0557593	122.796
	22	Carduus crispus L.	Compositae	Carduus L.	AB	M	13.9201	0.119499	122.345
	23	Sedum aizoon L.	Crassulaceae	Sedum L.	PF	XM	1.55353	0.00686487	226.887
	24	Glycyrrhiza uralensis Fisch.	Leguminosae	Glycyrrhiza L.	PF	MX	18.8962	0.187693	100.428
	25	Agropyron cristatum (L.) Garrtn.	Gramineae	Agropyron Gaertn.	PG	X	3.64483	0.0352564	103.381	1.54306	0.0144288	106.943
	26	Setaria viridis (L.)	Gramineae	Setaria Beauv.	AB	M						309.994
	27	Lappula myosotis V. Wolf.	Boraginaceae	Lappula V. Wolf.	AB	XM				0.486708	0.00314747	156.567
	28	Bupleurum scorzonerifolium Willd.	Umbelliferae	Bupleurum L.	PF	X	2.32152	0.0257659	90.8782
	29	Allium condensatum Turcz.	Liliaceae	Allium L.	PF	MX	12.8885	0.150457	85.6623
	30	Carex rostrata korshinskyi Kom.	Cyperaceae	Carex L.	PF	MX	1.55051	0.010476	148.006	0.734174	0.006617	110.953
	31	Chenopodium glaucum L.	Chenopodiaceae	Chenopodium L.	AB	M	2.14687	0.0114704	189.503	0.999581	0.00660488	151.977
	32	Potentilla tanacetifolia Willd. Ex Schlecht.	Rosaceae	Potentilla L.	PF	MX	19.754	0.152523	129.009	14.3557	0.118348	123.522
	33	Stellera chamaejasme L.	Thymelaeaceae	Stellera L.	PF	X	0.690123	0.00425945	163.617
	34	Artemisia frigida Willd.	Compositae	Artemisia L.	SS	X	0.758404	0.00543207	139.616
	35	Schizonepeta tenuifolia (Benth.) Briq.	Labiatae	Schizonepeta Briq.	AB	MX	8.33573	0.0695544	119.976
	36	Artemisia integrifolia L.	Compositae	Artemisia L.	PF	M	0.619472	0.00487093	134.316
	37	Spiraea aquilegifolia Pall.	Rosaceae	Spiraea L.	SS	XM	0.508601	0.00442739	115.377
	38	Serratula centauroides L.	Compositae	Serratula L.	PF	MX	16.8173	0.162723	103.048
	39	Iris lactea Pall. var. chinensis (Fisch.) Koidz.	Iridaceae	Iris L.	PF	M	22.2995	0.134974	168.697
	40	Sphallerocarpus gracilis (Bess.) K. -Pol.	Umbelliferae	Sphallerocarpus Bess. ex DC.	AB	M	1.01981	0.00343739	296.443
	41	Kochia prostrata (L.) Schrad.	Chenopodiaceae	Kochia Roth	SS	X	0.725405	0.00734967	98.699
	42	Galium verum L.	Rubiaceae	Galium L.	PF	M	0.236849	0.00297912	80.122
	43	Thermopsis lanceolata R. Br.	Leguminosae	Thermopsis R. Br.	PF	MX	7.41722	0.0550778	136.614			90.981
	44	Koeleria cristata (L.) Pers.	Gramineae	Koeleria Pers.	PG	X	1.61404	0.0277008	58.2668
	45	Artemisia pubescens Ledeb.	Compositae	Artemisia L.	PF	X	0.315396	0.0143138	132.903
	46	Potentilla betonicaefolia Poir.	Rosaceae	Potentilla L.	PF	X				3.16787	0.0366575	87.9559
	47	Allium bidentatum Fisch. ex Prokh.	Liliaceae	Allium L.	PF	X				0.303094	0.00377469	80.2964
	48	Allium senescens L.	Liliaceae	Allium L.	PF	MX	5.0435	0.0535123	94.2492
	49	Polygonum persicaria L.	Polygonaceae	Polygonum L.	AB	M	5.70097	0.0377958	154.283
	50	Bromus inermis Leyss.	Gramineae	Bromus L.	PG	M	4.89569	0.0315678	155.085
	51	Dontostemon eglandulosus (DC.) Ledeb.	Cruciferae	Dontostemon Andrz.	AB	X	0.257837	0.00251138	103.221	0.254554	0.00187468	134.157
	52	Pulsatilla turczaninovii Kryl. et Serg.	Ranunculaceae	Pulsatilla Adans.	PF	MX	21.0381	0.190613	110.371
	53	Allium tenuissimum L.	Liliaceae	Allium L.	PF	X	2.23758	0.0195853	114.248			84.7204
	54	Iris tenuifolia Pall.	Iridaceae	Iris L.	PF	MX	12.3116	0.0646913	190.313			177.506
	55	Caragana microphylla Lam.	Leguminosae	Caragana Fabr.	SS	X	2.36551	0.0207109	114.681
	56	Asparagus dauricus Fisch. ex Link	Liliaceae	Asparagus L.	PF	MX	0.19593	0.00346042	56.777
	57	Potentilla acaulis L.	Rosaceae	Potentilla L.	PF	X	4.01572	0.0253604	161.383	3.41655	0.0280621	122.681
	58	Leymus chinensis (Trin.) Tzvel.	Gramineae	Leymus Hochst.	PG	X	7.96616	0.0705397	112.932	2.48519	0.0265853	93.4796
	59	Cannabis sativa L. f. ruderalis (Janisch.) Chu	Moraceae	Cannabis L.	AB	M	16.6158	0.0882543	188.444
	60	Allium ramosum L.	Liliaceae	Allium L.	PF	MX		0.0186077
	61	Achnatherum sibiricum (L.) Keng	Gramineae	Achnatherum Beauv.	PG	MX	9.8574	0.0664469	148.35	2.19826	0.0191573	114.748
	62	Thalictrum squarrosum Steph. ex Willd.	Ranunculaceae	Thalictrum L.	PF	MX	11.8567	0.0769467	154.09
	63	Anemarrhena asphodeloides Bunge	Liliaceae	Anemarrhena Bunge	PF	MX	7.16792	0.0526208	136.218
	64	Axyris amaranthoides L.	Chenopodiaceae	Axyris L.	AB	M	2.15986	0.0108864	198.944	1.52598	0.00825262	186.904
	65	Adenophora stenanthina (Ledeb.) Kitag. Var. erispata (Korsh.) Y. Z. Zhao	Cammpanulaceae	Adenophora Fisch.	PF	XM	1.81118	0.0138136	129.726
	66	Salsola collina Pall.	Chenopodiaceae	Salsola L.	AB	XM	0.566422	0.00519351	110.852	0.195141	0.00190082	102.443
	67	Artemisia scoparia Waldst. et Kit. Pl. var. Hung.	Compositae	Artemisia L.	AB	X	0.528398	0.00342073	154.469
Stipa grandis typical steppe	1	Heteropappus altaicus (Willd.) Novopokr.	Compositae	Heteropappus Less.	PF	MX	0.42219	0.00355925	119.462
62 species belong to 24 families and 47 genera	2	Allium anisopodium Ledeb.	Liliaceae	Allium L.	PF	M			60.6319
	3	Astragalus galactittes Pall.	Leguminosae	Astragalus L.	PF	X				0.106084	0.0009761	109.673
	4	Thalictrum petaloideum L.	Ranunculaceae	Thalictrum L.	PF	XM	5.69689	0.0435171	130.911	1.03833	0.00756213	141.906
	5	Haplophyllum dauricum (L.) Juss.	Rutaceae	Haplophyllum Juss.	PF	X	0.27051	0.00242882	111.586
	6	Melilotoides ruthenica (L.) Sojak	Leguminosae	Melilotoides Heist. Ex Fabr.	PF	MX	0.965886	0.0064482	149.792	0.632754	0.00360833	175.359
	7	Scutellaria scordifolia Fisch. ex Schrank	Labiatae	Scutellaria L.	PF	XM	3.29748	0.0282905	117.183
	8	Cleistogenes squarrosa (Trin.) Keng	Gramineae	Cleistogenes Keng	PG	X	1.14407	0.00570733	200.456	0.296448	0.00204853	144.712
	9	Astragalus melilotoides Pall.	Leguminosae	Astragalus L.	PF	MX	0.217287	0.00267045	81.1101
	10	Chenopodium aristatum L.	Chenopodiaceae	Chenopodium L.	AB	M	0.910013	0.00472799	197.277			209.545
	11	Delphinium grandiflorum L.	Ranunculaceae	Delphinium L.	PF	XM	8.13117	0.064265	129.055
	12	Gentiana dahurica Fisch.	Gentianaceae	Gentiana L.	PF	MX	10.5531	0.108204	100.564	2.92913	0.0238368	122.85
	13	Cymbaria dahurica L.	Scrophulariaceae	Pedicularis L.	PF	X	0.167973	0.00238838	71.2326
	14	Stipa grandis P. Smirn.	Gramineae	Stipa L.	PG	X	3.4315	0.0310895	110.375	1.77073	0.0228075	77.6379
	15	Artemisia sieversiana Ehrhart ex Willd.	Compositae	Artemisia L.	AB	M	16.264	0.0815811	199.36	9.17435	0.0361637	255.943
	16	Lepidium apetalum Willd.	Cruciferae	Lepidium L.	AB	XM	0.446344	0.00253017	180.801
	17	Potentilla bifurca L.	Rosaceae	Potentilla L.	PF	X	7.54079	0.0622938	121.077
	18	Amaranthus retroflexus L.	Amaranthaceae	Amaranthus L.	AB	M	25.3962	0.173245	149.843	3.79312	0.0223395	167.595
	19	Saposhnikovia divaricata (Turcz.) Schischk.	Umbelliferae	Saposhnikovia Schischk.	PF	X	11.345	0.097693	116.129
	20	Sibbaldia adpressa Bunge	Rosaceae	Sibbaldia L.	PF	X				1.63682	0.0120336	136.782
	21	Agropyron cristatum (L.) Garrtn.	Gramineae	Agropyron Gaertn.	PG	X	2.3431	0.0253955	92.2646	0.934198	0.0114641	81.4889
	22	Setaria viridis (L.)	Gramineae	Setaria Beauv.	AB	M	12.8061	0.0528047	242.519
	23	Lappula myosotis V. Wolf.	Boraginaceae	Lappula V. Wolf.	AB	XM	0.619561	0.00461392	130.671
	24	Bupleurum scorzonerifolium Willd.	Umbelliferae	Bupleurum L.	PF	X	2.73722	0.0292503	94.292
	25	Allium condensatum Turcz.	Liliaceae	Allium L.	PF	MX	11.9805	0.160321	74.7284
	26	Carex rostrata korshinskyi Kom.	Cyperaceae	Carex L.	PF	MX	3.46596	0.0297241	116.604	0.928499	0.00956567	97.0658
	27	Chenopodium glaucum L.	Chenopodiaceae	Chenopodium L.	AB	M	1.94207	0.0125754	157.541	0.583501	0.00311625	187.258
	28	Chenopodium acuminatum Willd.	Chenopodiaceae	Chenopodium L.	AB	M	4.36596	0.0286431	155.369	1.33842	0.00623904	214.923
	29	Potentilla tanacetifolia Willd. Ex Schlecht.	Rosaceae	Potentilla L.	PF	MX	22.0686	0.17369	132.699
	30	Stellera chamaejasme L.	Thymelaeaceae	Stellera L.	PF	X	0.744465	0.00487957	155.731
	31	Artemisia frigida Willd.	Compositae	Artemisia L.	SS	X	0.830643	0.00567507	146.367	0.0509896	0.000459881	111.806
	32	Echinops latifolius Tausch.	Compositae	Echinops L.	PF	MX	12.8435	0.126334	99.5107	7.89423	0.0771747	100.926
	33	Serratula centauroides L.	Compositae	Serratula L.	PF	MX	25.4903	0.232444	107.629
	34	Dianthus chinensis L. var. veraicolor (Fisch. ex Link) Ma	Caryophyllaceae	Dianthus L.	PF	MX	0.812937	0.00856578	96.1349
	35	Kochia prostrata (L.) Schrad.	Chenopodiaceae	Kochia Roth	SS	X	0.710587	0.00826147	86.0122
	36	Koeleria cristata (L.) Pers.	Gramineae	Koeleria Pers.	PG	X	2.90838	0.0250282	116.204			223.209
	37	Allium bidentatum Fisch. ex Prokh.	Liliaceae	Allium L.	PF	X	2.34566	0.0235402	99.6449			104.379
	38	Allium senescens L.	Liliaceae	Allium L.	PF	MX	5.85711	0.0835083	70.138
	39	Corispermum declinatum Steph. ex Stev.	Chenopodiaceae	Corispermum L.	AB	X	0.677932	0.00473768	144.454	0.723232	0.0042058	174.528
	40	Dianthus chinensis L.	Caryophyllaceae	Dianthus L.	PF	XM	1.34192	0.0132828	102.998
	41	Linum perenne L.	Linaceae	Linum L.	PF	X	0.303859	0.00247467	120.049
	42	Convolvulus arvensis L.	Convolvulaceae	Convolvulus L.	PF	M	4.68222	0.0255589	192.101
	43	Ceratoides latens (J. F. Gmel.) Reveal et Holmgren	Chenopodiaceae	Ceratoides (Tourn.) Gagnebin	SS	X	3.25466	0.0256471	133.606
	44	Orosiachys fimbriatus (Turcz.) Berger	Crassulaceae	Orosiachys (DC.) Fisch.	AB	X	2.05737	0.0101031	203.638
	45	Dontostemon eglandulosus (DC.) Ledeb.	Cruciferae	Dontostemon Andrz.	AB	X	0.312274	0.00229748	140.715
	46	Allium tenuissimum L.	Liliaceae	Allium L.	PF	X	2.17408	0.0269303	80.7297			125.262
	47	Veronica linariifolia Pall. ex Link	Scrophulariaceae	Veronica L.	PF	XM	0.672585	0.00756485	88.1695
	48	Iris tenuifolia Pall.	Iridaceae	Iris L.	PF	MX	27.0982	0.0920977	294.234	5.77846	0.0214067	269.937
	49	Caragana microphylla Lam.	Leguminosae	Caragana Fabr.	SS	X	2.21971	0.0205952	108.377
	50	Potentilla acaulis L.	Rosaceae	Potentilla L.	PF	X	3.49946	0.0245486	142.527	1.93618	0.0168501	114.906
	51	Polygonum aviculare L.	Polygonaceae	Polygonum L.	AB	M	0.68094	0.0030466	225.691
	52	Leymus chinensis (Trin.) Tzvel.	Gramineae	Leymus Hochst.	PG	X	5.36127	0.0548843	97.683	2.15604	0.0246795	87.3616
	53	Cannabis sativa L. f. ruderalis (Janisch.) Chu	Moraceae	Cannabis L.	AB	M	19.7847	0.114668	175.742
	54	Allium ramosum L.	Liliaceae	Allium L.	PF	MX	5.62695	0.050899	110.551
	55	Convolvulus ammannii Desr.	Convolvulaceae	Convolvulus L.	PF	X	0.480674	0.00356606	137.041	0.214418	0.00126001	169.875
	56	Oxytropis hirta Bunge	Leguminosae	Oxytropis DC.	PF	XM	2.93609	0.0234353	126.648
	57	Ptilotrichum canescens C. A. Mey.	Cruciferae	Ptilotrichum C.AC.Mey	SS	X	0.521953	0.00437796	120.874
	58	Scutellaria viscidula Bunge	Labiatae	Scutellaria L.	PF	MX	1.19368	0.0073559	162.651
	59	Anemarrhena asphodeloides Bunge	Liliaceae	Anemarrhena Bunge	PF	MX	5.70383	0.0440001	129.632
	60	Axyris amaranthoides L.	Chenopodiaceae	Axyris L.	AB	M	2.06179	0.0120436	172.309	1.13225	0.0053918	205.249
	61	Salsola collina Pall.	Chenopodiaceae	Salsola L.	AB	XM	0.191897	0.00222955	87.197	0.111298	0.00147793	76.3325
	62	Artemisia scoparia Waldst. et Kit. Pl. var. Hung.	Compositae	Artemisia L.	AB	X	0.642982	0.00436667	147.248
Caragana microphylla typical steppe	1	Heteropappus altaicus (Willd.) Novopokr.	Compositae	Heteropappus Less.	PF	MX	0.364343	0.0032118	114.802
72 species belong to 26 families and 56 genera	2	Artemisia argyi Lévl. et Van.	Compositae	Artemisia L.	PF	M	9.70916	0.0519934	186.185
	3	Astragalus galactittes Pall.	Leguminosae	Astragalus L.	PF	X	0.134837	0.00123735	108.065
	4	Thalictrum petaloideum L.	Ranunculaceae	Thalictrum L.	PF	XM	3.56269	0.037705	94.4885	1.63395	0.0158043	102.844
	5	Haplophyllum dauricum (L.) Juss.	Rutaceae	Haplophyllum Juss.	PF	X	0.189191	0.00147623	129.997
	6	Melilotoides ruthenica (L.) Sojak	Leguminosae	Melilotoides Heist. Ex Fabr.	PF	MX	0.41056	0.00352813	116.367	0.683766	0.00580833	117.61
	7	Cleistogenes squarrosa (Trin.) Keng	Gramineae	Cleistogenes Keng	PG	X	0.696276	0.005854	118.94	0.733615	0.00359967	203.801
	8	Astragalus melilotoides Pall.	Leguminosae	Astragalus L.	PF	MX	0.345376	0.00349811	94.4776
	9	Polygonum divaricatum L.	Polygonaceae	Polygonum L.	PF	XM	5.46794	0.0366422	150.3
	10	Adenophora stenanthina (Ledeb.) Kitag.	Cammpanulaceae	Adenophora Fisch.	PF	XM	0.940032	0.00753121	131.658
	11	Lespedeza davurica (Laxm.) Schindl.	Leguminosae	Lespedeza Michx.	PF	MX	2.93253	0.0218869	134.889
	12	Cymbaria dahurica L.	Scrophulariaceae	Pedicularis L.	PF	X	0.256149	0.00329729	79.7828
	13	Stipa grandis P. Smirn.	Gramineae	Stipa L.	PG	X	2.97942	0.034934	85.2871	3.71576	0.0415783	89.3678
	14	Artemisia sieversiana Ehrhart ex Willd.	Compositae	Artemisia L.	AB	M	13.9087	0.0724687	191.927
	15	Cynanchum thesioides (Freyn) K. Schum.	Asclepiadaceae	Cynanchum L.	PF	X	0.941069	0.00925054	101.394
	16	Lepidium apetalum Willd.	Cruciferae	Lepidium L.	AB	XM	0.131078	0.000972876	134.569
	17	Orosiachys malacephyllus (Pall.) Fisch.	Crassulaceae	Orosiachys (DC.) Fisch.	AB	X	4.36434	0.0253602	173.932
	18	Potentilla bifurca L.	Rosaceae	Potentilla L.	PF	X	6.93496	0.0666004	105.205	3.02334	0.0317389	98.775
	19	Limonium bicolor (Bunge) O.Kuntze	Plumbaginaceae	Limonium Mill.	PF	X	13.6029	0.123046	111.475
	20	Saposhnikovia divaricata (Turcz.) Schischk.	Umbelliferae	Saposhnikovia Schischk.	PF	X	10.6461	0.0997987	106.676
	21	Carduus crispus L.	Compositae	Carduus L.	AB	M	11.3209	0.111968	101.988
	22	Sedum aizoon L.	Crassulaceae	Sedum L.	PF	XM	1.69792	0.0084073	205.565
	23	Agropyron cristatum (L.) Garrtn.	Gramineae	Agropyron Gaertn.	PG	X	4.03524	0.0402212	100.326	3.73226	0.0453118	82.3682
	24	Setaria viridis (L.)	Gramineae	Setaria Beauv.	AB	M	18.7505	0.0426003	440.15
	25	Lappula myosotis V. Wolf.	Boraginaceae	Lappula V. Wolf.	AB	XM	0.137507	0.00191913	71.6537	0.188778	0.00186441	100.676
	26	Bupleurum scorzonerifolium Willd.	Umbelliferae	Bupleurum L.	PF	X	1.52317	0.024775	60.3257
	27	Allium condensatum Turcz.	Liliaceae	Allium L.	PF	MX	15.474	0.159783	96.8436
	28	Medicago falcata L.	Leguminosae	Medicago L.	PF	XM	1.34753	0.0110176	123.487
	29	Carex rostrata korshinskyi Kom.	Cyperaceae	Carex L.	PF	MX	1.25161	0.012311	101.666	1.52959	0.0159557	95.8647
	30	Chenopodium glaucum L.	Chenopodiaceae	Chenopodium L.	AB	M	4.98903	0.0311102	162.051
	31	Potentilla tanacetifolia Willd. Ex Schlecht.	Rosaceae	Potentilla L.	PF	MX	14.3373	0.134634	107.124	4.37108	0.0461878	95.5601
	32	Stellera chamaejasme L.	Thymelaeaceae	Stellera L.	PF	X	0.500556	0.0035367	140.519
	33	Artemisia frigida Willd.	Compositae	Artemisia L.	SS	X	0.804	0.00542397	148.231
	34	Schizonepeta tenuifolia (Benth.) Briq.	Labiatae	Schizonepeta Briq.	AB	MX	2.5019	0.0270606	92.524
	35	Spiraea aquilegifolia Pall.	Rosaceae	Spiraea L.	SS	XM	0.458271	0.00370062	125.419	0.427389	0.00349421	124.649
	36	Echinops latifolius Tausch.	Compositae	Echinops L.	PF	MX	13.3069	0.193678	67.4799
	37	Serratula centauroides L.	Compositae	Serratula L.	PF	MX	24.0828	0.21864	109.106
	38	Urtica cannabina L.	Urticaceae	Urtica L.	PF	M	5.6341	0.0275459	207.485
	39	Iris lactea Pall. var. chinensis (Fisch.) Koidz.	Iridaceae	Iris L.	PF	M			53.9636
	40	Erodium stephanianum Willd.	Geraniaceae	Erodium L'Herit	AB	XM	4.00177	0.0498189	150.675	2.41279	0.0137469	176.794
	41	Sphallerocarpus gracilis (Bess.) K. -Pol.	Umbelliferae	Sphallerocarpus Bess. ex DC.	AB	M	1.12426	0.00539711	208.565
	42	Kochia prostrata (L.) Schrad.	Chenopodiaceae	Kochia Roth	SS	X	0.73373	0.0064746	113.324	0.0810301	0.000977673	85.8736
	43	Melandrium apricum (Turcz. ex Fisch. et Mey.) Rohrb.	Caryophyllaceae	Melandrium Roehl.	AB	MX	0.525848	0.00638905	88.1665
	44	Thermopsis lanceolata R. Br.	Leguminosae	Thermopsis R. Br.	PF	MX	8.22254	0.0595978	138.89
	45	Koeleria cristata (L.) Pers.	Gramineae	Koeleria Pers.	PG	X	1.72318	0.0261214	65.968
	46	Artemisia pubescens Ledeb.	Compositae	Artemisia L.	PF	X	0.374639	0.00360163	104.019
	47	Allium bidentatum Fisch. ex Prokh.	Liliaceae	Allium L.	PF	X	0.969184	0.0150047	64.5922	2.01466	0.0124142	162.287
	48	Allium senescens L.	Liliaceae	Allium L.	PF	MX	5.1146	0.054201	94.3636
	49	Dianthus chinensis L.	Caryophyllaceae	Dianthus L.	PF	XM	0.293942	0.00349564	86.0846
	50	Convolvulus arvensis L.	Convolvulaceae	Convolvulus L.	PF	M	2.14523	0.011722	181.698
	51	Orosiachys fimbriatus (Turcz.) Berger	Crassulaceae	Orosiachys (DC.) Fisch.	AB	X	2.61054	0.00990378	263.59
	52	Dontostemon eglandulosus (DC.) Ledeb.	Cruciferae	Dontostemon Andrz.	AB	X	0.19258	0.00159506	121.092
	53	Pulsatilla turczaninovii Kryl. et Serg.	Ranunculaceae	Pulsatilla Adans.	PF	MX	4.18051	0.0508993	82.6178
	54	Allium tenuissimum L.	Liliaceae	Allium L.	PF	X	7.55443	0.017338	435.715	1.87724	0.0187577	100.078
	55	Iris tenuifolia Pall.	Iridaceae	Iris L.	PF	MX	23.0268	0.0912067	252.468	6.99609	0.0417647	167.512
	56	Dontostemon eglandulosus (DC.) Ledeb.	Cruciferae	Dontostemon Andrz.	PF	XM	1.41045	0.0102953	138.335
	57	Caragana microphylla Lam.	Leguminosae	Caragana Fabr.	SS	X	3.26208	0.0318916	102.742	1.61981	0.0160619	102.686
	58	Asparagus dauricus Fisch. ex Link	Liliaceae	Asparagus L.	PF	MX	0.0870536	0.00131669	73.8097
	59	Potentilla acaulis L.	Rosaceae	Potentilla L.	PF	X	3.33451	0.0292708	113.916	2.02816	0.0244738	82.9676
	60	Polygonum aviculare L.	Polygonaceae	Polygonum L.	AB	M	0.549652	0.00353185	159.166
	61	Leymus chinensis (Trin.) Tzvel.	Gramineae	Leymus Hochst.	PG	X	7.13157	0.0637385	111.888	8.30391	0.093655	88.6649
	62	Cannabis sativa L. f. ruderalis (Janisch.) Chu	Moraceae	Cannabis L.	AB	M	15.0449	0.0792193	190.66
	63	Allium ramosum L.	Liliaceae	Allium L.	PF	MX	3.00441	0.0255133	117.758			73.1526
	64	Leonurus japonicus Houtt.	Labiatae	Leonurus L.	AB	M	8.07039	0.0690563	116.964
	65	Oxytropis hirta Bunge	Leguminosae	Oxytropis DC.	PF	XM	0.183171	0.0023269	78.7221
	66	Achnatherum sibiricum (L.) Keng	Gramineae	Achnatherum Beauv.	PG	MX	8.46899	0.0642685	131.775	5.94375	0.0474133	125.36
	67	Thalictrum squarrosum Steph. ex Willd.	Ranunculaceae	Thalictrum L.	PF	MX	10.8653	0.0760833	142.808
	68	Anemarrhena asphodeloides Bunge	Liliaceae	Anemarrhena Bunge	PF	MX			115.39
	69	Axyris amaranthoides L.	Chenopodiaceae	Axyris L.	AB	M	4.95345	0.0288519	172.52	0.912606	0.00764104	119.373
	70	Salsola collina Pall.	Chenopodiaceae	Salsola L.	AB	XM	0.156955	0.00195948	79.8207	0.088285	0.00141102	62.656
	71	Artemisia scoparia Waldst. et Kit. Pl. var. Hung.	Compositae	Artemisia L.	AB	X	0.422093	0.00300287	140.563
	72	Medicago sativa L.	Leguminosae	Medicago L.	PF	M	1.19066	0.011777	101.911
Artemisia frigida typical steppe	1	Heteropappus altaicus (Willd.) Novopokr.	Compositae	Heteropappus Less.	PF	MX	0.199925	0.00190341	105.86	0.121847	0.00139878	88.7094
66 species belong to 29 families and 53 genera	2	Allium anisopodium Ledeb.	Liliaceae	Allium L.	PF	M				3.01642	0.0277389	108.743
	3	Astragalus galactittes Pall.	Leguminosae	Astragalus L.	PF	X	0.127079	0.00145549	90.0072	0.308079	0.00283756	109.968
	4	Thymus serpyllum L. var. mongolicus Roon.	Labiatae	Thymus L.	SS	MX				0.0716026	0.0006782	105.577
	5	Thalictrum petaloideum L.	Ranunculaceae	Thalictrum L.	PF	XM	5.78755	0.0657873	87.9736	4.36169	0.058465	74.6034
	6	Melilotoides ruthenica (L.) Sojak	Leguminosae	Melilotoides Heist. Ex Fabr.	PF	MX	0.40854	0.00378047	108.066	0.430559	0.00429437	100.261
	7	Cleistogenes squarrosa (Trin.) Keng	Gramineae	Cleistogenes Keng	PG	X	0.870455	0.00587383	148.192	0.539752	0.00435589	123.913
	8	Astragalus melilotoides Pall.	Leguminosae	Astragalus L.	PF	MX	0.191147	0.00259504	74.0889	0.48471	0.00485904	99.978
	9	Polygonum divaricatum L.	Polygonaceae	Polygonum L.	PF	XM	3.26187	0.0235872	137.96
	10	Lespedeza davurica (Laxm.) Schindl.	Leguminosae	Lespedeza Michx.	PF	MX	2.67153	0.0194993	138.641
	11	Cymbaria dahurica L.	Scrophulariaceae	Pedicularis L.	PF	X	0.10721	0.00106473	102.168	0.125348	0.00181516	69.4094
	12	Vicia gigantea Bunge	Leguminosae	Vicia L.	PF	MX				2.27438	0.0126204	184.631
	13	Stipa grandis P. Smirn.	Gramineae	Stipa L.	PG	X	4.09613	0.0376013	108.936	1.33318	0.0157086	84.8695
	14	Artemisia sieversiana Ehrhart ex Willd.	Compositae	Artemisia L.	AB	M	4.26273	0.154255	143.501	18.6931	0.121001	154.487
	15	Chamaerhodos erecta (L.) Bunge	Rosaceae	Chamaerhodos Bunge	AB	MX				0.575549	0.00596378	96.5075
	16	Orosiachys malacephyllus (Pall.) Fisch.	Crassulaceae	Orosiachys (DC.) Fisch.	AB	X	2.88521	0.0148643	198.152
	17	Potentilla bifurca L.	Rosaceae	Potentilla L.	PF	X	4.80994	0.0414785	117.459	4.85458	0.0500336	102.08
	18	Limonium bicolor (Bunge) O.Kuntze	Plumbaginaceae	Limonium Mill.	PF	X	11.2272	0.125403	94.5578
	19	Saposhnikovia divaricata (Turcz.) Schischk.	Umbelliferae	Saposhnikovia Schischk.	PF	X	4.5367	0.0401643	112.953
	20	Sibbaldia adpressa Bunge	Rosaceae	Sibbaldia L.	PF	X	1.96761	0.0236173	83.3123
	21	Agropyron cristatum (L.) Garrtn.	Gramineae	Agropyron Gaertn.	PG	X	9.12065	0.0513352	177.669	3.02922	0.037913	79.8994
	22	Setaria viridis (L.)	Gramineae	Setaria Beauv.	AB	M				3.81347	0.0179578	212.357
	23	Lappula myosotis V. Wolf.	Boraginaceae	Lappula V. Wolf.	AB	XM	0.0684463	0.000720242	97.3518
	24	Bupleurum scorzonerifolium Willd.	Umbelliferae	Bupleurum L.	PF	X	2.00536	0.0240658	83.581
	25	Allium condensatum Turcz.	Liliaceae	Allium L.	PF	MX	23.2672	0.199183	116.814
	26	Carex rostrata korshinskyi Kom.	Cyperaceae	Carex L.	PF	MX	2.30502	0.0199672	115.441	1.32416	0.0129203	102.487
	27	Achnatherum splendens (Trin.) Nevski	Gramineae	Achnatherum Beauv.	PG	XM				16.6638	0.266737	62.473
	28	Chenopodium acuminatum Willd.	Chenopodiaceae	Chenopodium L.	AB	M	3.01796	0.0204124	149.376	1.61656	0.0137068	118.809
	29	Potentilla tanacetifolia Willd. Ex Schlecht.	Rosaceae	Potentilla L.	PF	MX	10.2383	0.0967177	107.691	7.4579	0.0748046	99.4423
	30	Stellera chamaejasme L.	Thymelaeaceae	Stellera L.	PF	X	0.47882	0.00359358	137.598	0.642413	0.00401402	155.276
	31	Artemisia frigida Willd.	Compositae	Artemisia L.	SS	X	0.687324	0.00577977	118.919	0.400638	0.00363277	110.285
	32	Spiraea aquilegifolia Pall.	Rosaceae	Spiraea L.	SS	XM	0.344303	0.0033789	101.81	0.321057	0.00257586	127.23
	33	Echinops latifolius Tausch.	Compositae	Echinops L.	PF	MX				12.3023	0.198162	64.588
	34	Serratula centauroides L.	Compositae	Serratula L.	PF	MX	10.8288	0.11566	93.805
	35	Iris lactea Pall. var. chinensis (Fisch.) Koidz.	Iridaceae	Iris L.	PF	M						52.1412
	36	Erodium stephanianum Willd.	Geraniaceae	Erodium L'Herit	AB	XM	4.28226	0.0498309	88.0836	5.56764	0.0381959	150.496
	37	Kochia prostrata (L.) Schrad.	Chenopodiaceae	Kochia Roth	SS	X	0.423798	0.00423593	100.048	0.663093	0.00677507	97.8726
	38	Melandrium apricum (Turcz. ex Fisch. et Mey.) Rohrb.	Caryophyllaceae	Melandrium Roehl.	AB	MX	0.68558	0.00963098	71.0561
	39	Koeleria cristata (L.) Pers.	Gramineae	Koeleria Pers.	PG	X	2.17862	0.0243103	89.6169
	40	Artemisia pubescens Ledeb.	Compositae	Artemisia L.	PF	X	0.439047	0.00354343	123.905	0.202118	0.00211022	95.7803
	41	Astragalus adsurgens Pall. cv. ‘Shadawang’	Leguminosae	Astragalus L.	PF	MX				11.9192	0.123307	95.8056
	42	Allium bidentatum Fisch. ex Prokh.	Liliaceae	Allium L.	PF	X	2.27885	0.0225972	100.846	1.53528	0.0153023	100.33
	43	Allium senescens L.	Liliaceae	Allium L.	PF	MX	11.3817	0.125139	90.9525	5.52007	0.0579698	95.2232
	44	Iris dichotoma Pall.	Iridaceae	Iris L.	PF	MX	25.6412	0.199612	138.626
	45	Corispermum declinatum Steph. ex Stev.	Chenopodiaceae	Corispermum L.	AB	X	0.203251	0.00196163	103.779	0.236961	0.00293975	80.2954
	46	Dianthus chinensis L.	Caryophyllaceae	Dianthus L.	PF	XM				0.369832	0.00478659	79.0914
	47	Ixeris chinensis (Thunb.) Nakai var. graminifolia (Ledeb.) H. C. Fu comb. nov.	Compositae	Ixeris Cass.	PF	MX				0.280156	0.00265486	122.16
	48	Convolvulus arvensis L.	Convolvulaceae	Convolvulus L.	PF	M	4.03078	0.0203996	199.67	2.95721	0.0120987	243.902
	49	Orosiachys fimbriatus (Turcz.) Berger	Crassulaceae	Orosiachys (DC.) Fisch.	AB	X	3.00987	0.0135388	222.314
	50	Dontostemon eglandulosus (DC.) Ledeb.	Cruciferae	Dontostemon Andrz.	AB	X	0.0823346	0.00104643	80.3729	0.0622619	0.000797748	78.4534
	51	Bassia dasyphylla (Fisch. et Mey.) O	Chenopodiaceae	Bassia All	AB	X				0.138387	0.00155445	91.1047
	52	Pulsatilla turczaninovii Kryl. et Serg.	Ranunculaceae	Pulsatilla Adans.	PF	MX	15.9288	0.190891	83.4443
	53	Allium tenuissimum L.	Liliaceae	Allium L.	PF	X	3.57291	0.0297437	120.123	2.68725	0.0259633	103.502
	54	Iris tenuifolia Pall.	Iridaceae	Iris L.	PF	MX	10.6417	0.0678559	156.828	5.89996	0.0319297	184.78
	55	Caragana microphylla Lam.	Leguminosae	Caragana Fabr.	SS	X	2.64253	0.0254422	105.048	2.13745	0.0248965	86.235
	56	Asparagus dauricus Fisch. ex Link	Liliaceae	Asparagus L.	PF	MX	0.150126	0.00180789	86.3375
	57	Potentilla acaulis L.	Rosaceae	Potentilla L.	PF	X	2.15497	0.025155	86.0896	2.68921	0.0306408	88.7581
	58	Leymus chinensis (Trin.) Tzvel.	Gramineae	Leymus Hochst.	PG	X	10.5978	0.097712	108.459	6.52397	0.0780633	83.5728
	59	Allium ramosum L.	Liliaceae	Allium L.	PF	MX	6.28484	0.047978	130.994	3.97986	0.0319573	124.537
	60	Leonurus japonicus Houtt.	Labiatae	Leonurus L.	AB	M				4.19003	0.0405041	104.736
	61	Oxytropis hirta Bunge	Leguminosae	Oxytropis DC.	PF	XM				0.143382	0.00158391	103.72
	62	Achnatherum sibiricum (L.) Keng	Gramineae	Achnatherum Beauv.	PG	MX	12.5809	0.0993873	126.585	7.73603	0.0653392	118.398
	63	Thalictrum squarrosum Steph. ex Willd.	Ranunculaceae	Thalictrum L.	PF	MX	15.3861	0.126803	121.338
	64	Axyris amaranthoides L.	Chenopodiaceae	Axyris L.	AB	M	1.33317	0.00782646	171.356	0.607776	0.0054934	110.279
	65	Salsola collina Pall.	Chenopodiaceae	Salsola L.	AB	XM				0.128734	0.00166015	78.3631
	66	Artemisia scoparia Waldst. et Kit. Pl. var. Hung.	Compositae	Artemisia L.	AB	X		0.00455077
